# Supplementary material
Source: PubMed Central journal article supplement (PMC11221628)
Supplement: NIHMS1568774-supplement-1.pdf [file NIHMS1568774-supplement-1.pdf]

# Emergent elements of inspiratory rhythmogenesis: network synchronization and synchrony propagation

Authors: Sufyan Ashhad and Jack L Feldman\*

\*Corresponding author: [feldman@g.ucla.edu](mailto:feldman@g.ucla.edu)

Supplemental Information

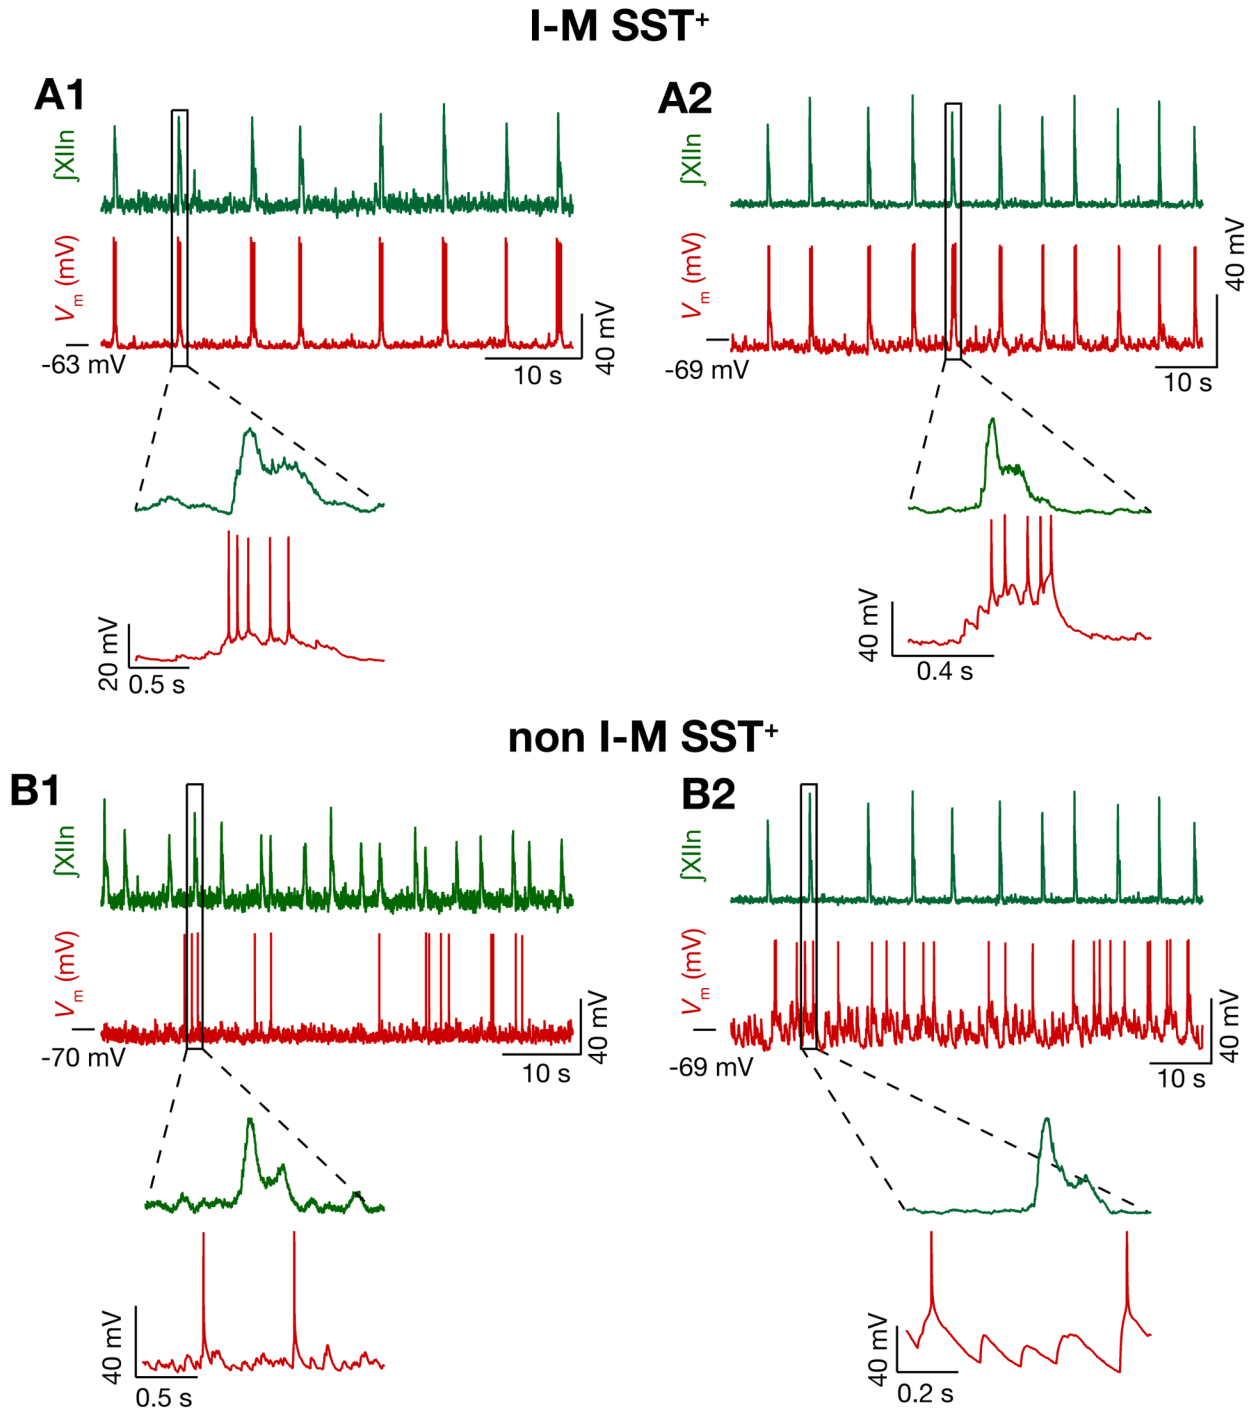

**Figure S1. I-M SST<sup>+</sup> neurons fire in phase with XIIIn I-burst. Related to Figure 2**

Firing profiles of inspiratory-modulated (I-M) SST<sup>+</sup> (A1-A2) and non I-M SST<sup>+</sup> (B1-B2) neurons in 9 mM [K<sup>+</sup>]<sub>ACSF</sub>. Traces in A1 are for same neuron as Fig. 2 (A1-A3). Neurons in (A2) and (B2) were recorded simultaneously.

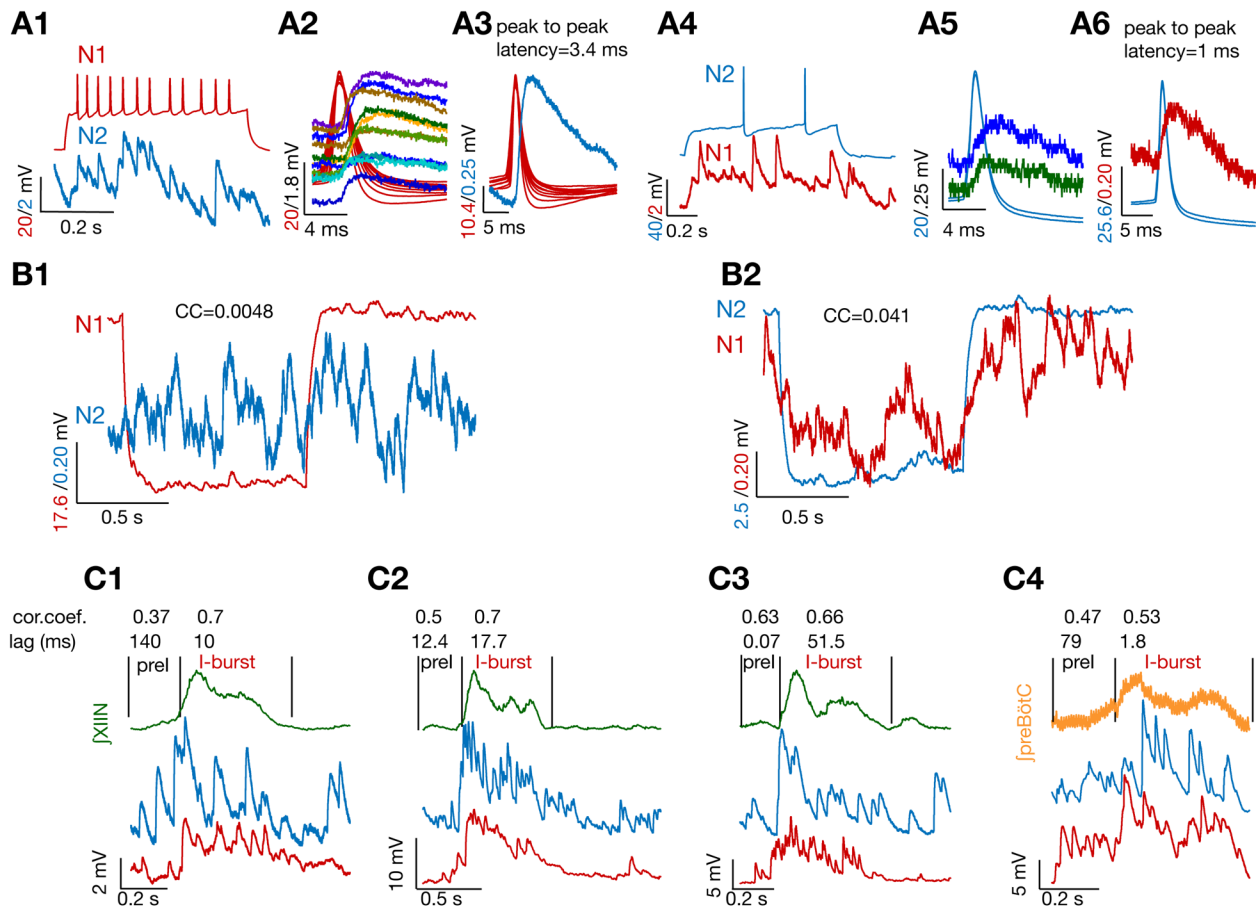

**Figure S2. preBötC I-M SST<sup>+</sup> neurons have sparse synaptic connectivity. Related to Figure 3**

(A1-A6)  $V_m$  of the only connected pair of neurons (1/50 tested) (N1 and N2). Spike triggered individual (A2: N2 and A5: N1) and averaged postsynaptic potentials (A3: N2; mean EPSP amplitude = 1.7 mV, latency to peak = 3.4 ms. and A6: N1; mean PSP amplitude = 0.22 mV, latency to peak = 1 ms) PSP latency of <2 ms indicates electrical coupling; also, note that the onset of PSP in A5 is substantially earlier than the EPSPs in A2. This was the *only* synaptically connected pair among 50 pairs of SST<sup>+</sup> neurons tested. (B1-B2) Simultaneously recorded averaged  $V_m$  traces (from 16-20 trials) from N1 and N2 when a hyperpolarizing current pulse was injected in either to assess electrical coupling. CC: coupling coefficient; This was also the only synaptically- or electrically-coupled pair among 50 pairs of SST<sup>+</sup> neurons tested. Thus, N1  $\Rightarrow$  N2 connection was excitatory synaptic, and N2  $\Rightarrow$  N1 connection was electrotonic. (C1-C4)  $V_m$  of four different simultaneously recorded I-M SST<sup>+</sup> pairs (red, blue) with correlated EPSPs during preI and I-bursts. Traces in (C1) are from N1 and N2 shown above. Pairs (C2), (C3), (C4) were not synaptically connected.

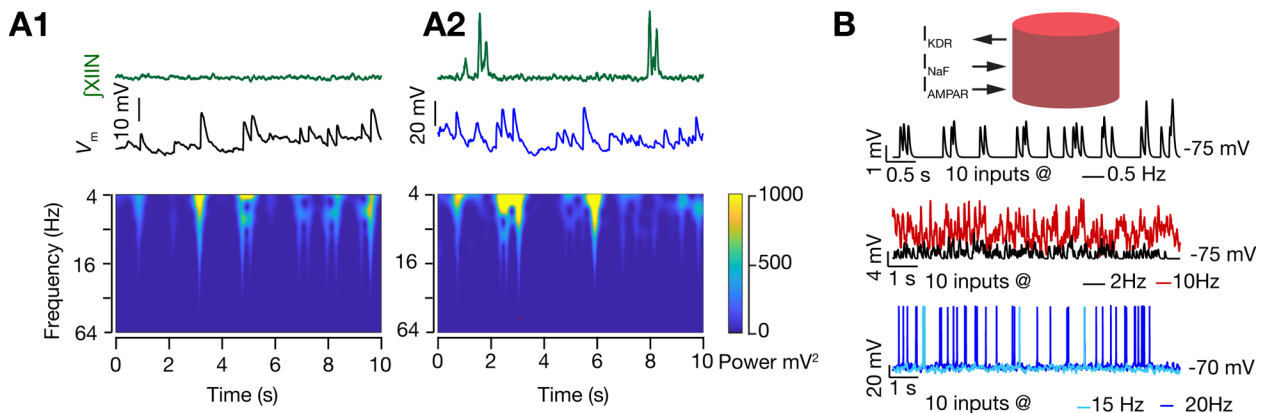

**Figure S3. Input synchrony was absent in non I-M SST<sup>+</sup> neurons during I-bursts. Related to Figure 4**

(A1-A2) Frequency-time plot of non I-M SST<sup>+</sup> neuron; same as in Figure 4B1-B2 but when the neuron was not spiking, in 9 mM  $[K^+]_{ACSF}$ . (B) Representation of a single compartmental biophysical neuronal model with three currents (see STAR Methods), bottom:  $V_m$  under conditions where 10 synaptic inputs were randomly activated at various frequencies, as indicated.

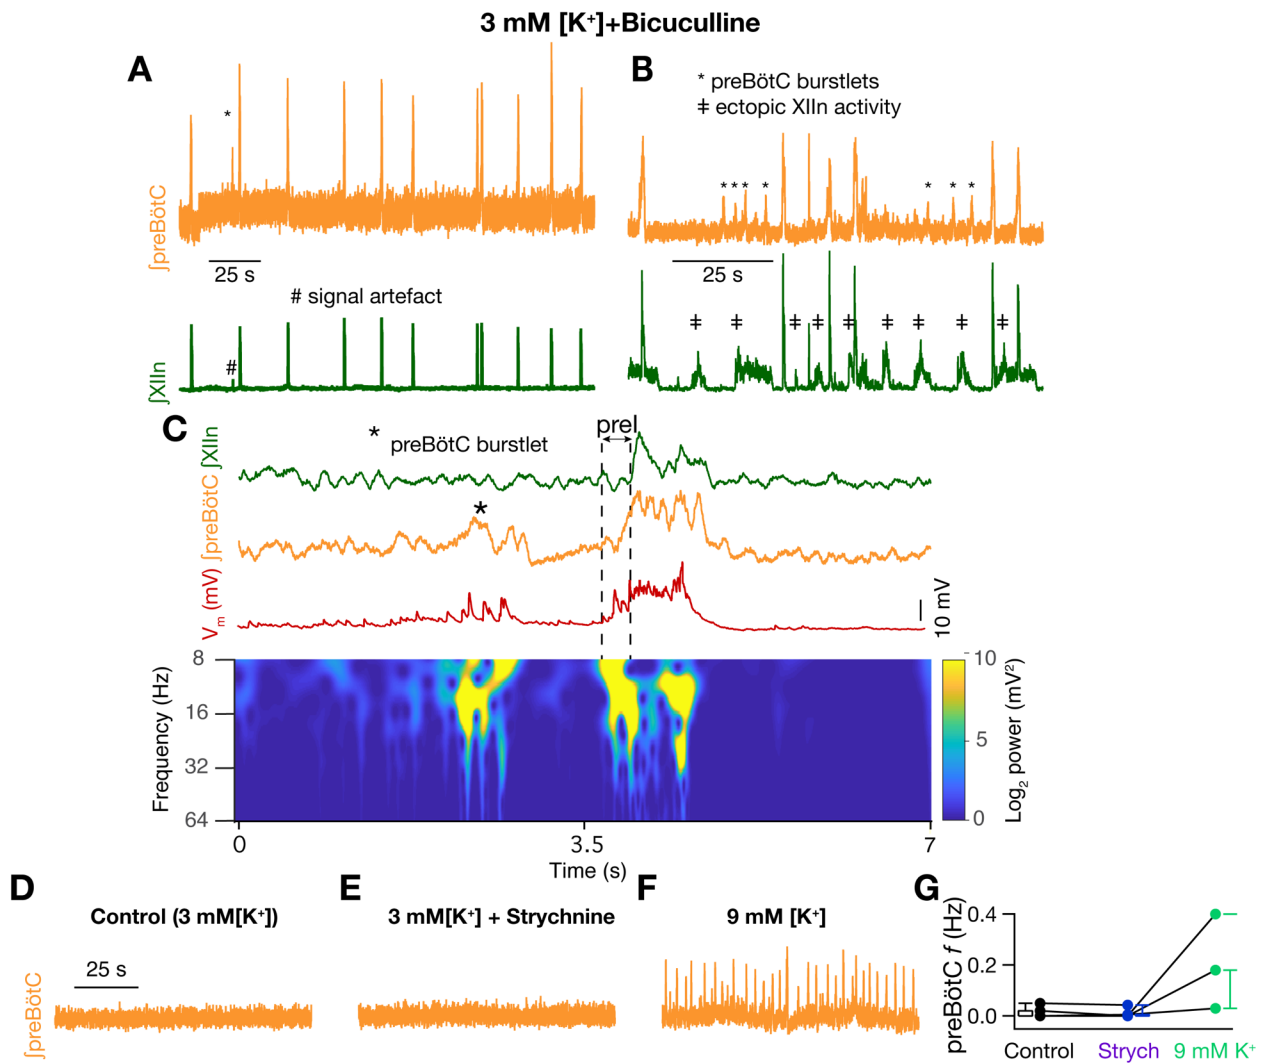

**Figure S4. GABA<sub>A</sub> inhibition gates preBötC rhythmicogenesis. Related to Figure 5**

(A-B) Simultaneously recorded preBötC (orange) and XIIIn (green) activity in two brainstem slices showing preBötC burstlets (marked by \*) that did not result in XIIIn I-bursts under 10  $\mu\text{M}$  Bicuculline (BIC). In a few slices recorded under this condition, ectopic XIIIn bursts ((B); marked ‡) were observed that were not concurrent with preBötC activity and, thus, were not considered for analysis. (C) preBötC and XIIIn activity and  $V_m$  of an I-M SST<sup>+</sup> neuron under BIC-induced rhythmic (3 mM [K<sup>+</sup>]<sub>ACSF</sub>) conditions. corresponding frequency-time plot of  $V_m$  plotted at bottom. Note the evolution of input synchrony onto this I-M SST<sup>+</sup> neuron in preI period. (D-G) preBötC activity of representative slice recorded under control (3 mM [K<sup>+</sup>]<sub>ACSF</sub>; (D), 2  $\mu\text{M}$  Strychnine (E) and in 9 mM [K<sup>+</sup>]<sub>ACSF</sub> after strychnine washout from the same slice (F). (G) Activity of 5 slices (including that depicted in Figure 5C; 3 of these slices were also recorded in 9 mM [K<sup>+</sup>]<sub>ACSF</sub> (green) after strychnine washout, e.g., as shown in D-F.

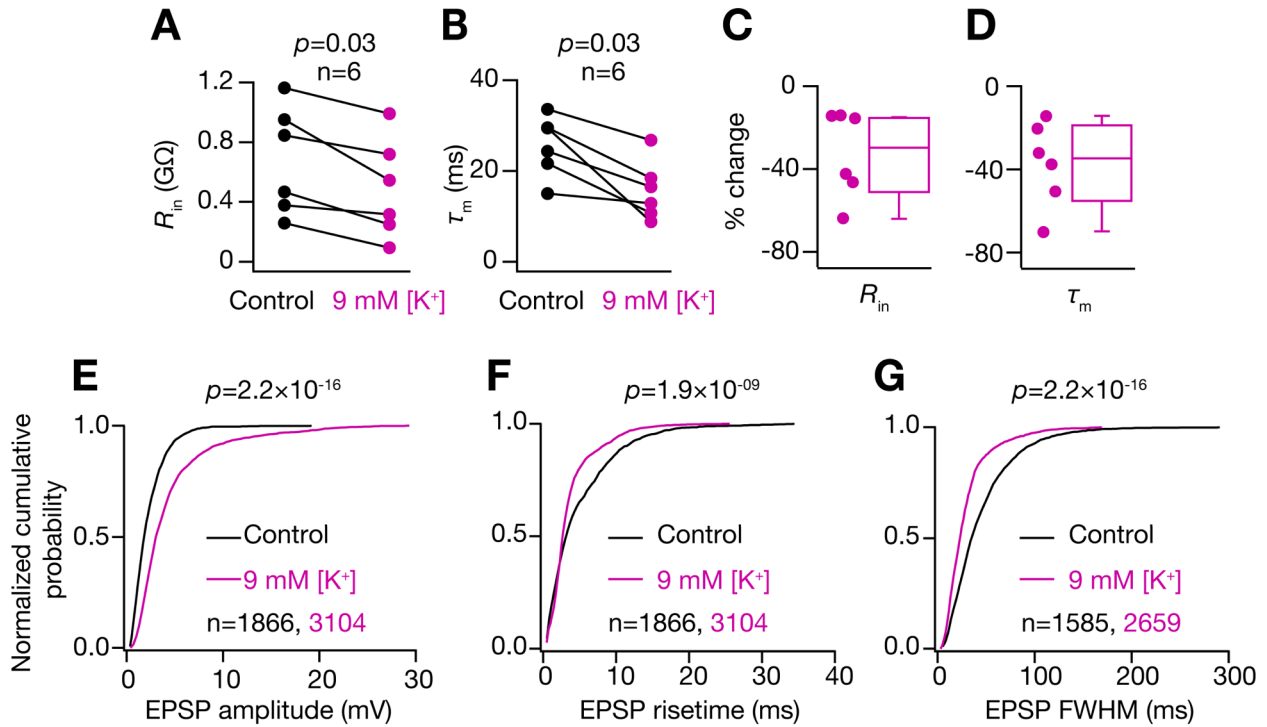

**Figure S5. I-M SST<sup>+</sup> neurons shift to higher conductance state in 9 mM [K<sup>+</sup>]<sub>ACSF</sub>. Related to Figures 5 and 6**

(A)  $R_{in}$ , and (B)  $\tau_m$ , of I-M SST<sup>+</sup> neurons recorded in control, i.e., 3 mM [K]<sub>ACSF</sub>, and rhythmic 9 mM [K<sup>+</sup>]<sub>ACSF</sub> conditions. (C-D) Percentage change in  $R_{in}$  (C) and  $\tau_m$  (D) of these neurons under 9 mM [K<sup>+</sup>]<sub>ACSF</sub>. (E-G) normalized cumulative probability of spontaneous EPSP amplitude (E), 20%-80% rise time (F), and FWHM (G) of I-M SST<sup>+</sup> neurons in control (black) and rhythmic 9 mM [K<sup>+</sup>]<sub>ACSF</sub> (pink) conditions. Note the increase in EPSP amplitude in (E) even with a decrease in  $R_{in}$  of these neurons with change of ACSF from 3 to 9 mM [K<sup>+</sup>], which could be attributed to an increase in the presynaptic release probability with steady-state depolarization of axon terminals under 9 mM [K<sup>+</sup>]<sub>ACSF</sub>. (A-B)  $p$  value for Wilcoxon signed rank test; (E-G)  $p$  value for Wilcoxon rank sum test. For (E-G)  $N$  = number of neurons=14
